# Supplementary material for: Urinary Volatomic Expression Pattern: Paving the Way for Identification of Potential Candidate Biosignatures for Lung Cancer
Source: MDPI journal article supplement (doi:10.3390/metabo12010036), 2022-01-04
Supplement: s1 [file s1]

**Table S1.** GC-qMS peak areas of the volatile metabolites identified in LC patients and healthy subjects (CTRL) organized by chemical family

| label      | Chemical Classes / Metabolites           | CTRL    |         |         |          | LC           |         |              |          | Fold change  |             |
|------------|------------------------------------------|---------|---------|---------|----------|--------------|---------|--------------|----------|--------------|-------------|
|            |                                          | AVG     | Max     | Min     | Freq (%) | AVG          | Max     | Min          | Freq (%) |              |             |
| Alcohols   |                                          |         |         |         |          |              |         |              |          | LC-CTRL      | % variation |
| 40         | Isopentanol                              | 1.7E+05 | 6.0E+05 | 2.7E+04 | 100      | 2.9E+05<br>5 | 3.2E+06 | 0.0E+00<br>0 | 89       | 1.2E+05      | 42.1        |
| 62         | 1-Hexanol                                | 1.0E+05 | 2.5E+05 | 0.0E+00 | 93       | 1.2E+05<br>5 | 9.1E+05 | 0.0E+00<br>0 | 82       | 1.8E+04      | 15.2        |
| 76         | 3,7-Dimethyl-3-octanol                   | 2.3E+05 | 5.1E+05 | 1.3E+05 | 100      | 1.8E+05<br>5 | 6.2E+05 | 1.8E+04<br>4 | 100      | -<br>5.5E+04 | -31.0       |
| 77         | 2-Ethyl-1-hexanol                        | 3.0E+05 | 5.4E+05 | 1.1E+05 | 100      | 2.2E+05<br>5 | 5.9E+05 | 0.0E+00<br>0 | 93       | -<br>8.2E+04 | -36.8       |
| 83         | 6,10-Dihydromyrcenol                     | 1.2E+07 | 1.1E+08 | 2.6E+05 | 100      | 5.4E+05<br>5 | 2.4E+06 | 0.0E+00<br>0 | 96       | -<br>1.2E+07 | -2155.9     |
| 101        | 3,7-Dimethyl-1,6-octadien-3-ol           | 1.1E+05 | 7.0E+05 | 0.0E+00 | 93       | 4.1E+04<br>4 | 2.5E+05 | 0.0E+00<br>0 | 64       | -<br>6.6E+04 | -160.6      |
| 136        | 2-Furanmethanol                          | 2.0E+05 | 6.9E+05 | 2.4E+04 | 100      | 1.6E+05<br>5 | 9.7E+05 | 0.0E+00<br>0 | 86       | -<br>4.9E+04 | -31.7       |
| 152        | 1-(3,5-Bis-trifluoromethylphenyl)ethanol | 7.5E+04 | 5.8E+05 | 0.0E+00 | 44       | 1.7E+07<br>7 | 3.4E+08 | 0.0E+00<br>0 | 79       | 1.7E+07      | 99.6        |
| 165        | 2,4,6-Trimethylbenzyl alcohol            | 2.4E+06 | 1.3E+07 | 6.7E+03 | 100      | 2.8E+05<br>5 | 2.1E+06 | 0.0E+00<br>0 | 86       | -<br>2.2E+06 | -764.9      |
| 189        | 1,2-Decanediol                           | 2.5E+08 | 4.0E+08 | 4.5E+07 | 100      | 1.7E+08<br>8 | 4.4E+08 | 8.8E+06<br>6 | 100      | -<br>7.6E+07 | -43.2       |
| TOTAL AREA |                                          | 2.7E+08 |         |         |          | 1.9E+08<br>8 |         |              |          |              |             |
| Aldehydes  |                                          |         |         |         |          |              |         |              |          |              |             |
| 41         | 2-Hexenal                                | 6.6E+05 | 4.4E+06 | 7.2E+04 | 100      | 4.9E+05<br>5 | 1.8E+06 | 9.5E+03<br>3 | 100      | -<br>1.7E+05 | -35         |

|                   |               |                |         |         |     |                |         |         |     |              |        |
|-------------------|---------------|----------------|---------|---------|-----|----------------|---------|---------|-----|--------------|--------|
| 79                | Furfural      | 3.1E+06        | 6.1E+06 | 1.2E+06 | 100 | 5.5E+06<br>6   | 1.4E+07 | 9.3E+05 | 100 | 2.3E+06      | 42.6   |
| 87                | Decanal       | 2.3E+07        | 9.3E+07 | 1.5E+06 | 100 | 2.3E+07<br>7   | 5.4E+07 | 2.4E+05 | 100 | -<br>6.2E+05 | -2.7   |
| 164               | Cuminaldehyde | 5.7E+06        | 3.3E+07 | 1.1E+06 | 100 | 1.9E+06<br>6   | 7.1E+06 | 2.5E+05 | 100 | -<br>3.8E+06 | -205.2 |
| <b>TOTAL AREA</b> |               | <b>3.3E+07</b> |         |         |     | <b>3.1E+08</b> |         |         |     |              |        |
|                   |               |                |         |         |     | <b>8</b>       |         |         |     |              |        |

### Benzene Derivatives

|     |                                                                |         |         |         |     |              |         |         |     |              |        |
|-----|----------------------------------------------------------------|---------|---------|---------|-----|--------------|---------|---------|-----|--------------|--------|
| 46  | <i>o</i> -Cymene                                               | 1.2E+08 | 5.0E+08 | 3.0E+04 | 100 | 3.6E+07<br>7 | 2.1E+08 | 0.0E+00 | 75  | -<br>8.0E+07 | -225.1 |
| 52  | 1-Isopropyl-3-methylbenzene                                    | 1.4E+07 | 1.6E+08 | 0.0E+00 | 85  | 3.8E+06<br>6 | 9.0E+07 | 0.0E+00 | 86  | -<br>1.0E+07 | -268.5 |
| 57  | Hemimellitene                                                  | 5.3E+06 | 1.7E+07 | 0.0E+00 | 96  | 3.3E+06<br>6 | 2.0E+07 | 0.0E+00 | 93  | -<br>2.0E+06 | -60.2  |
| 64  | <i>p</i> -Cymenene                                             | 5.1E+07 | 1.6E+08 | 3.8E+04 | 100 | 1.1E+07<br>7 | 3.4E+07 | 0.0E+00 | 93  | -<br>4.0E+07 | -368.6 |
| 68  | Toluene                                                        | 5.5E+05 | 7.5E+06 | 1.3E+03 | 100 | 2.1E+05<br>5 | 1.7E+06 | 0.0E+00 | 89  | -<br>3.4E+05 | -161.4 |
| 71  | (1,4-Dimethylpent-2-enyl)benzene                               | 2.0E+06 | 9.5E+06 | 0.0E+00 | 74  | 1.4E+06<br>6 | 1.2E+07 | 0.0E+00 | 93  | -<br>6.7E+05 | -49.3  |
| 72  | Benzene, 1-butenyl-, (Isomer)-                                 | 3.2E+07 | 1.8E+08 | 0.0E+00 | 93  | 1.4E+07<br>7 | 6.3E+07 | 0.0E+00 | 86  | -<br>1.7E+07 | -121   |
| 84  | 1,2,4,5-Tetramethylbenzene                                     | 8.4E+06 | 2.6E+07 | 3.5E+05 | 100 | 5.0E+06<br>6 | 1.4E+07 | 0.0E+00 | 96  | -34E+06      | -68.4  |
| 98  | 1H-Trindene, 2,3,4,5,6,7,8,9-octahydro-1,1,4,4,9,9-hexamethyl- | 1.6E+06 | 6.3E+06 | 2.5E+05 | 100 | 2.9E+06<br>6 | 1.3E+07 | 1.3E+05 | 100 | 1.3E+06      | 43.8   |
| 153 | Benzoyl isocyanate                                             | 1.4E+06 | 4.2E+06 | 1.3E+05 | 100 | 6.4E+05<br>5 | 3.2E+06 | 1.3E+05 | 100 | -72E+05      | -112.9 |
| 162 | Oxime-,methoxy-phenyl-                                         | 1.9E+06 | 8.8E+06 | 4.5E+05 | 100 | 1.1E+06<br>6 | 7.1E+06 | 1.9E+03 | 100 | -<br>7.4E+05 | -65.8  |
| 176 | $\alpha$ -Bromomesitylene                                      | 9.5E+06 | 7.5E+07 | 1.9E+05 | 100 | 6.2E+06<br>6 | 4.4E+07 | 0.0E+00 | 93  | -<br>3.3E+06 | -53.9  |

|            |                                                  |         |         |         |     |         |         |         |     |   |        |
|------------|--------------------------------------------------|---------|---------|---------|-----|---------|---------|---------|-----|---|--------|
| 190        | Tricyclazole                                     | 8.3E+06 | 4.1E+07 | 7.4E+05 | 100 | 8.5E+05 | 4.5E+06 | 5.4E+04 | 100 | - | -871.7 |
| 198        | 4,4,5,8-tetramethylchromene                      | 4.3E+07 | 1.9E+08 | 8.2E+06 | 100 | 1.8E+07 | 1.2E+08 | 7.8E+05 | 100 | - | -135.9 |
| 202        | Eugenol                                          | 1.7E+07 | 1.2E+08 | 1.0E+05 | 100 | 1.6E+06 | 1.2E+07 | 3.6E+04 | 100 | - | -941.6 |
| 212        | 1H-Inden-1-one, 2,3-dihydro-3,3,4,5-pentamethyl- | 1.4E+05 | 3.2E+05 | 3.5E+04 | 100 | 7.2E+04 | 2.9E+05 | 0.0E+00 | 82  | - | -94.2  |
| 218        | Indole                                           | 2.7E+06 | 2.5E+07 | 8.9E+04 | 100 | 2.0E+05 | 5.6E+05 | 0.0E+00 | 82  | - | 46.6   |
| TOTAL AREA |                                                  | 3.2E+08 |         |         |     | 1.2E+08 |         |         |     |   |        |

#### Esters

|            |                                                                                 |         |         |         |     |         |         |         |     |   |        |
|------------|---------------------------------------------------------------------------------|---------|---------|---------|-----|---------|---------|---------|-----|---|--------|
| 125        | Methyl benzoate                                                                 | 1.3E+06 | 8.0E+06 | 7.3E+04 | 100 | 1.2E+06 | 5.4E+06 | 1.7E+05 | 100 | - | -10.4  |
| 177        | Propanoic acid, 2-methyl-, 1-(1,1-dimethylethyl)-2-methyl-1,3-propanediyl ester | 2.2E+07 | 5.4E+07 | 2.7E+06 | 100 | 8.9E+06 | 2.3E+07 | 1.6E+05 | 100 | - | -142.2 |
| 220        | Diisobutyl phthalate                                                            | 2.7E+05 | 1.5E+06 | 0.0E+00 | 48  | 2.0E+06 | 1.5E+07 | 0.0E+00 | 86  | - | 86.4   |
| TOTAL AREA |                                                                                 | 2.3E+07 |         |         |     | 1.2E+07 |         |         |     |   |        |

#### Furans

|    |                                                      |         |         |         |     |         |         |         |     |   |        |
|----|------------------------------------------------------|---------|---------|---------|-----|---------|---------|---------|-----|---|--------|
| 3  | Furan                                                | 1.6E+06 | 5.1E+06 | 0.0E+00 | 96  | 2.4E+05 | 1.7E+06 | 0.0E+00 | 46  | - | -551.4 |
| 13 | 2,5-Dimethylfuran                                    | 7.2E+05 | 2.3E+06 | 0.0E+00 | 89  | 7.0E+05 | 2.3E+06 | 3.3E+04 | 100 | - | -2.3   |
| 15 | 2-Ethyl-5-methylfuran                                | 4.5E+06 | 3.7E+07 | 3.0E+05 | 100 | 1.9E+06 | 1.2E+07 | 8.3E+04 | 100 | - | -131.8 |
| 44 | 2,2-Dimethyl-5-(1-methyl-1-propenyl)-tetrahydrofuran | 2.0E+06 | 8.2E+06 | 1.5E+05 | 100 | 8.0E+05 | 3.6E+06 | 0.0E+00 | 96  | - | -149.2 |

|            |                                                                   |         |         |         |     |         |         |         |     |         |         |
|------------|-------------------------------------------------------------------|---------|---------|---------|-----|---------|---------|---------|-----|---------|---------|
| 61         | 2-Methyl-3-(methylthio)furan                                      | 6.4E+05 | 1.5E+06 | 3.6E+04 | 100 | 8.0E+05 | 3.2E+06 | 0.0E+00 | 93  | 1.6E+05 | 20.2    |
| 75         | 5-Ethenyltetrahydro-5-trimethyl-trans-2-furanmethanol             | 9.0E+05 | 3.9E+06 | 7.1E+04 | 100 | 8.6E+05 | 6.0E+06 | 1.6E+04 | 100 | -       | -3.8    |
| 81         | Linalool oxide                                                    | 8.2E+06 | 5.1E+07 | 2.6E+05 | 100 | 4.2E+05 | 2.3E+06 | 0.0E+00 | 96  | -       | -1853.2 |
| 105        | 5-Methyl-2-furancarboxaldehyde                                    | 3.7E+06 | 9.7E+06 | 9.9E+05 | 100 | 5.1E+06 | 3.6E+07 | 6.3E+05 | 100 | 1.4E+06 | 28.3    |
| 122        | Dihydro-5-methyl-2(3H)-furanone                                   | 3.4E+05 | 1.4E+06 | 4.8E+03 | 100 | 2.7E+05 | 1.5E+06 | 0.0E+00 | 79  | -       | -27.4   |
| 145        | Benzofuran, 4,7-dimethyl-                                         | 2.3E+06 | 8.0E+06 | 3.0E+05 | 100 | 1.5E+06 | 7.9E+06 | 8.0E+04 | 100 | -       | -56.7   |
| 203        | 2-[(E)-(2-ethoxy-3,4-dimethylcyclohex-2-en-1-ylidene)methyl]furan | 1.6E+06 | 1.2E+07 | 4.5E+04 | 100 | 9.8E+04 | 6.3E+05 | 1.1E+04 | 100 | -       | -1538.7 |
| TOTAL AREA |                                                                   | 2.6E+07 |         |         |     | 1.3E+07 |         |         |     |         |         |

#### Hydrocarbons

|            |                                |         |         |         |     |         |         |         |     |   |       |
|------------|--------------------------------|---------|---------|---------|-----|---------|---------|---------|-----|---|-------|
| 104        | 2-Methyl-1-butene              | 1.7E+05 | 5.9E+05 | 0.0E+00 | 81  | 1.1E+05 | 3.6E+05 | 0.0E+00 | 82  | - | -53.6 |
| 159        | 4,5-Dehydro-Isolongifolene     | 2.2E+06 | 1.4E+07 | 2.3E+05 | 100 | 1.4E+06 | 6.0E+06 | 3.9E+04 | 100 | - | -57.6 |
| 183        | 4,5,9,10-Dehydroisolongifolene | 2.9E+06 | 3.2E+07 | 7.9E+04 | 100 | 2.0E+06 | 1.2E+07 | 0.0E+00 | 89  | - | -43.0 |
| TOTAL AREA |                                | 5.3E+06 |         |         |     | 3.6E+06 |         |         |     |   |       |

#### Ketones

|    |             |         |         |         |     |         |         |         |     |         |      |
|----|-------------|---------|---------|---------|-----|---------|---------|---------|-----|---------|------|
| 4  | Acetone     | 1.2E+07 | 2.3E+07 | 1.5E+06 | 100 | 1.8E+07 | 9.5E+07 | 1.2E+06 | 100 | 6.2E+06 | 34.8 |
| 8  | Butanone    | 4.1E+06 | 1.4E+07 | 5.4E+05 | 100 | 7.7E+06 | 3.6E+07 | 2.7E+05 | 100 | 3.6E+06 | 46.8 |
| 14 | 2-Pentanone | 2.1E+07 | 9.4E+07 | 1.7E+06 | 100 | 5.0E+07 | 2.4E+08 | 1.2E+06 | 100 | 2.9E+07 | 58.2 |

|     |                                                      |         |         |         |     |         |         |         |     |         |       |
|-----|------------------------------------------------------|---------|---------|---------|-----|---------|---------|---------|-----|---------|-------|
| 22  | 3-Hexanone                                           | 2.1E+06 | 6.0E+06 | 1.3E+05 | 100 | 3.6E+06 | 1.4E+07 | 2.0E+05 | 100 | 1.5E+06 | 40.9  |
| 27  | 4-Heptanone                                          | 6.1E+07 | 1.8E+08 | 5.6E+06 | 100 | 7.0E+07 | 3.2E+08 | 0.0E+00 | 96  | 9.0E+06 | 12.8  |
| 32  | 2-Heptanone                                          | 2.6E+06 | 5.8E+06 | 1.1E+05 | 100 | 6.3E+06 | 7.4E+07 | 1.8E+05 | 100 | 3.7E+06 | 58.8  |
| 60  | 3-Ethylcyclopentanone                                | 2.0E+05 | 1.2E+06 | 0.0E+00 | 93  | 3.3E+05 | 4.5E+06 | 0.0E+00 | 89  | 1.3E+05 | 38.9  |
| 69  | 3,5,5-Trimethyl-2-cyclohexen-1-one                   | 7.2E+05 | 2.1E+06 | 1.3E+05 | 100 | 1.4E+06 | 5.4E+06 | 3.3E+04 | 100 | 6.6E+05 | 48.0  |
| 82  | 6-Camphenone                                         | 2.8E+05 | 1.1E+06 | 3.2E+04 | 100 | 2.2E+05 | 1.1E+06 | 0.0E+00 | 96  | -       | -29.4 |
| 86  | 2-Decanone                                           | 2.3E+07 | 9.3E+07 | 1.4E+06 | 100 | 1.9E+07 | 5.4E+07 | 0.0E+00 | 93  | -       | -25.7 |
| 91  | 2-Acetylfuran                                        | 9.6E+06 | 3.9E+07 | 1.3E+06 | 100 | 1.1E+07 | 3.0E+07 | 1.0E+06 | 100 | 1.1E+06 | 10    |
| 94  | 1-(4-Methoxyphenyl)-1,3-butanedi-one                 | 2.8E+05 | 1.2E+06 | 0.0E+00 | 93  | 4.5E+05 | 2.6E+06 | 0.0E+00 | 93  | 1.8E+05 | 38.7  |
| 115 | 4-Cyclopentene-1,3-dione                             | 4.2E+05 | 8.0E+05 | 1.8E+05 | 100 | 6.4E+05 | 5.4E+06 | 1.2E+05 | 100 | 2.2E+05 | 34.8  |
| 134 | Acetophenone                                         | 2.3E+06 | 2.6E+07 | 2.5E+05 | 100 | 1.2E+06 | 3.6E+06 | 1.6E+05 | 100 | -       | -90.7 |
| 139 | 4-Hydroxy-4-methyl-5-hexenoic acid $\gamma$ -lactone | 8.3E+05 | 3.5E+06 | 0.0E+00 | 81  | 7.9E+05 | 4.8E+06 | 0.0E+00 | 79  | -       | -4.1  |
| 154 | 1-H-Inden-1-one,2,3-dihydro-3,3,5,6-tetramethyl      | 2.5E+07 | 8.1E+07 | 3.6E+06 | 100 | 1.3E+07 | 7.5E+07 | 6.8E+05 | 100 | -       | -90.5 |
| 158 | Cyclopenten-4-one, 1,2,3,3-tetramethyl-              | 6.4E+05 | 1.8E+06 | 1.6E+05 | 100 | 3.2E+05 | 1.5E+06 | 0.0E+00 | 89  | -       | -97.9 |
| 163 | m-Methylacetophenone                                 | 5.5E+06 | 2.6E+07 | 5.9E+05 | 100 | 4.7E+06 | 4.8E+07 | 3.4E+05 | 100 | -       | -16.7 |
| 166 | $\gamma$ -Caprolactone                               | 2.8E+05 | 2.0E+06 | 0.0E+00 | 96  | 2.7E+05 | 1.6E+06 | 0.0E+00 | 89  | -       | -0.8  |
| 168 | $\beta$ -Damascenone                                 | 7.9E+06 | 2.2E+07 | 1.5E+06 | 100 | 5.8E+06 | 4.3E+07 | 1.1E+05 | 100 | -       | -37.3 |

|                   |                                                                         |                |         |         |     |         |                |         |     |   |         |
|-------------------|-------------------------------------------------------------------------|----------------|---------|---------|-----|---------|----------------|---------|-----|---|---------|
| 182               | (E)-(2,4,4-Trimethylcyclohex-1,5-dien-1-yl]but-3-en-2-one               | 9.3E+05        | 3.8E+06 | 0.0E+00 | 96  | 3.9E+05 | 2.5E+06        | 0.0E+00 | 96  | - | -140.4  |
| 200               | 2,3,3-Trimethyl-2H-inden-1-one                                          | 6.3E+05        | 1.9E+06 | 7.2E+04 | 100 | 2.0E+05 | 7.5E+05        | 0.0E+00 | 96  | - | -215.8  |
| 210               | 4-(2,3,6-Trimethylphenyl)-2-butanone                                    | 1.4E+06        | 6.7E+06 | 2.6E+05 | 100 | 8.8E+05 | 3.3E+06        | 4.3E+04 | 100 | - | -55.8   |
| 216               | 1-(4-Hydroxy-3,5-di-tert-butylphenyl)-2-methyl-3-morpholinopropan-1-one | 1.5E+07        | 8.6E+07 | 0.0E+00 | 96  | 3.8E+05 | 1.4E+06        | 0.0E+00 | 46  | - | -3706.2 |
| <b>TOTAL AREA</b> |                                                                         | <b>3.8E+08</b> |         |         |     |         | <b>5.3E+08</b> |         |     |   |         |

#### Naphthalene derivatives

|              |                                                               |                |         |         |     |         |                |         |     |         |        |
|--------------|---------------------------------------------------------------|----------------|---------|---------|-----|---------|----------------|---------|-----|---------|--------|
| 73           | $\alpha$ -Ionene                                              | 1.2E+07        | 3.6E+07 | 0.0E+00 | 93  | 6.2E+06 | 4.0E+07        | 0.0E+00 | 86  | -       | -97.6  |
| 93           | 2(1H)-Naphthalenone, 3,4,4a,5,6,7-hexahydro-1,1,4a-trimethyl- | 6.4E+06        | 3.6E+07 | 4.4E+05 | 100 | 1.1E+07 | 8.0E+07        | 0.0E+00 | 96  | 4.6E+06 | 41.6   |
| 156          | 1,2-Dihydro-1,1,6-trimethylnaphthalene                        | 8.2E+07        | 1.7E+08 | 1.2E+07 | 100 | 6.0E+07 | 1.8E+08        | 4.8E+06 | 100 | -       | -37.4  |
| 186          | 1,7-Dimethylnaphthalene                                       | 3.7E+06        | 2.2E+07 | 4.0E+05 | 100 | 9.5E+05 | 4.4E+06        | 4.4E+04 | 100 | -       | -294.4 |
| 191          | 6-Hydroxy-3,8-dimethyl-5-propan-2-yl-naphthalene-1,2-dione    | 7.2E+06        | 3.2E+07 | 4.0E+05 | 100 | 1.9E+06 | 8.4E+06        | 9.8E+04 | 100 | -       | -272.8 |
| 208          | Cadalene                                                      | 5.2E+07        | 1.9E+08 | 5.8E+06 | 100 | 2.0E+07 | 5.9E+07        | 1.1E+06 | 100 | -       | -160.9 |
| <b>TOTAL</b> |                                                               | <b>3.8E+08</b> |         |         |     |         | <b>5.3E+08</b> |         |     |         |        |

#### Fatty Acids

|     |                 |         |         |         |     |         |         |         |    |         |      |
|-----|-----------------|---------|---------|---------|-----|---------|---------|---------|----|---------|------|
| 78  | Acetic acid     | 6.7E+06 | 1.8E+07 | 7.5E+04 | 100 | 1.7E+07 | 1.3E+08 | 0.0E+00 | 96 | 1.0E+07 | 60.5 |
| 114 | Isobutyric acid | 4.3E+05 | 1.5E+06 | 1.4E+05 | 100 | 4.4E+05 | 3.2E+06 | 0.0E+00 | 93 | 1.0E+04 | 2.3  |

|     |                             |                |         |         |     |                |         |         |     |         |       |
|-----|-----------------------------|----------------|---------|---------|-----|----------------|---------|---------|-----|---------|-------|
| 116 | 3-Pentenoic acid, 4-methyl- | 3.6E+05        | 1.2E+06 | 5.9E+04 | 100 | 4.4E+05        | 1.3E+06 | 2.9E+04 | 100 | 8.3E+04 | 18.7  |
| 141 | Ethylmethylacetic acid      | 6.4E+05        | 2.0E+06 | 0.0E+00 | 93  | 1.2E+06        | 9.2E+06 | 0.0E+00 | 68  | 5.6E+05 | 46.8  |
| 192 | Caprylic acid               | 7.6E+06        | 2.8E+07 | 1.3E+06 | 100 | 6.0E+06        | 2.5E+07 | 1.0E+06 | 100 | -       | -25.7 |
| 201 | Pelargonic acid             | 1.8E+06        | 2.7E+06 | 6.2E+05 | 100 | 1.1E+06        | 3.3E+06 | 1.0E+05 | 100 | -       | -54.1 |
| 213 | Capric acid                 | 4.0E+06        | 9.4E+06 | 5.8E+05 | 100 | 2.4E+06        | 1.5E+07 | 9.0E+04 | 100 | -       | -65.4 |
| 219 | Dodecanoic acid             | 1.3E+06        | 3.2E+06 | 2.8E+05 | 100 | 1.5E+06        | 8.8E+06 | 0.0E+00 | 89  | 1.6E+05 | 11.1  |
|     | <b>TOTAL</b>                | <b>2.3E+07</b> |         |         |     | <b>3.0E+07</b> |         |         |     |         |       |

#### Organosulphurs

|     |                             |         |         |         |     |         |         |         |     |         |        |
|-----|-----------------------------|---------|---------|---------|-----|---------|---------|---------|-----|---------|--------|
| 2   | Methanethiol                | 1.2E+07 | 3.2E+07 | 3.3E+06 | 100 | 1.1E+07 | 4.4E+07 | 1.1E+06 | 100 | -       | -1.4   |
| 5   | 1-Propanethiol              | 1.8E+05 | 1.0E+06 | 0.0E+00 | 85  | 7.4E+04 | 7.8E+05 | 0.0E+00 | 39  | -       | -138.6 |
| 24  | Dimethyldisulfide           | 1.8E+08 | 4.3E+08 | 3.7E+07 | 100 | 3.2E+08 | 1.3E+09 | 4.1E+07 | 100 | 1.4E+08 | 43.0   |
| 42  | Methyl propyl disulfide     | 5.8E+05 | 2.0E+06 | 1.0E+04 | 100 | 4.9E+05 | 3.8E+06 | 0.0E+00 | 89  | -       | -19.9  |
| 45  | 2,4-Dimethylthiophene       | 3.2E+06 | 1.5E+07 | 0.0E+00 | 85  | 1.5E+06 | 9.3E+06 | 0.0E+00 | 75  | -       | -108.2 |
| 51  | Methyl 2-propenyl disulfide | 5.6E+06 | 3.3E+07 | 7.2E+04 | 100 | 2.7E+06 | 1.6E+07 | 1.8E+01 | 100 | -       | -103.4 |
| 97  | 3-(Methylthio)thiophene     | 4.9E+05 | 1.8E+06 | 1.0E+05 | 100 | 3.8E+05 | 2.2E+06 | 2.6E+04 | 100 | -       | -30.5  |
| 143 | 2,5-Dimethylthiophene       | 1.5E+06 | 3.7E+06 | 3.5E+05 | 100 | 1.4E+06 | 3.6E+06 | 3.1E+05 | 100 | -       | -5.3   |
| 178 | Dimethyl sulfone            | 9.2E+05 | 2.1E+06 | 1.8E+05 | 100 | 7.5E+05 | 2.9E+06 | 0.0E+00 | 96  | -       | -22.6  |

| TOTAL               |                             | 2.1E+08 |         |         |     | 3.4E+08 |         |         |     |         |        |
|---------------------|-----------------------------|---------|---------|---------|-----|---------|---------|---------|-----|---------|--------|
|                     |                             |         |         |         |     | 8       |         |         |     |         |        |
| Phenols             |                             |         |         |         |     |         |         |         |     |         |        |
| 171                 | 2-Chlorophenol              | 3.1E+05 | 1.2E+06 | 4.7E+03 | 100 | 2.9E+05 | 1.7E+06 | 0.0E+00 | 96  | -       | -5.2   |
| 173                 | Guaiacol                    | 3.5E+06 | 2.1E+07 | 9.2E+03 | 100 | 3.0E+06 | 1.8E+07 | 2.7E+04 | 100 | -       | -16.3  |
| 184                 | 2-Bromophenol               | 1.4E+05 | 2.6E+05 | 0.0E+00 | 96  | 2.9E+04 | 1.7E+05 | 0.0E+00 | 64  | -       | -389.4 |
| 188                 | Phenol                      | 2.9E+07 | 9.1E+07 | 3.7E+02 | 100 | 5.6E+07 | 6.9E+08 | 0.0E+00 | 68  | 2.6E+07 | 47.6   |
| 195                 | p-Cresol                    | 7.0E+07 | 3.6E+08 | 7.7E+05 | 100 | 2.5E+08 | 1.8E+09 | 7.5E+06 | 100 | 1.8E+08 | 72.6   |
| 196                 | 2,4,6-Triisopropylphenol    | 1.5E+05 | 5.6E+05 | 0.0E+00 | 93  | 6.0E+04 | 4.7E+05 | 0.0E+00 | 71  | -       | -152   |
| 197                 | 4-tert-Butyl-2-chlorophenol | 1.9E+05 | 5.4E+05 | 0.0E+00 | 96  | 1.5E+05 | 4.0E+05 | 4.5E+04 | 100 | -       | -23.2  |
| 204                 | 3-Hydroxybenzotrifluoride   | 1.1E+06 | 8.1E+06 | 8.9E+04 | 100 | 1.9E+05 | 8.2E+05 | 0.0E+00 | 96  | -       | -451.2 |
| 205                 | 5-Isopropyl-2-methylphenol  | 8.9E+06 | 9.5E+07 | 4.9E+05 | 100 | 3.2E+06 | 1.7E+07 | 2.5E+05 | 100 | -       | -177.8 |
| 206                 | Thymol                      | 1.4E+07 | 9.5E+07 | 1.3E+06 | 100 | 3.9E+06 | 2.5E+07 | 1.2E+05 | 100 | -       | -272.2 |
| 207                 | 4-tert-Butyl-2-Bromophenol  | 3.1E+05 | 7.1E+05 | 8.0E+04 | 100 | 1.2E+05 | 6.2E+05 | 1.1E+04 | 100 | -       | -155.3 |
| 214                 | 4-tert-Butylphenol          | 4.0E+05 | 9.4E+05 | 1.2E+05 | 100 | 3.9E+05 | 1.1E+06 | 1.2E+05 | 100 | -       | -2.3   |
| 215                 | 2,4-Di-tert-butylphenol     | 8.9E+07 | 1.9E+08 | 1.8E+07 | 100 | 6.1E+07 | 1.5E+08 | 6.7E+06 | 100 | -       | -45.6  |
| TOTAL               |                             | 2.2E+08 |         |         |     | 3.8E+08 |         |         |     |         |        |
|                     |                             |         |         |         |     | 8       |         |         |     |         |        |
| Terpene Derivatives |                             |         |         |         |     |         |         |         |     |         |        |



|     |                           |         |         |         |     |             |         |             |     |         |        |
|-----|---------------------------|---------|---------|---------|-----|-------------|---------|-------------|-----|---------|--------|
| 34  | Limonene (isomer)         | 3.3E+05 | 1.9E+06 | 4.5E+04 | 100 | 3.3E+0<br>5 | 1.6E+06 | 0.0E+0<br>0 | 89  | -       | -1.4   |
| 90  | $\alpha$ -Carene          | 1.1E+06 | 8.7E+06 | 0.0E+00 | 93  | 7.7E+0<br>5 | 3.0E+06 | 0.0E+0<br>0 | 89  | -       | -44.3  |
| 92  | $\alpha$ -Ionone          | 3.6E+06 | 1.3E+07 | 4.0E+05 | 100 | 4.5E+0<br>6 | 3.0E+07 | 4.9E+0<br>4 | 100 | 8.8E+05 | 19.8   |
| 95  | $\beta$ -Ionone           | 1.9E+06 | 8.3E+06 | 0.0E+00 | 96  | 2.2E+0<br>6 | 1.7E+07 | 0.0E+0<br>0 | 89  | 3.2E+05 | 14.1   |
| 100 | $\alpha$ -Cedrene         | 2.2E+06 | 1.6E+07 | 1.6E+05 | 100 | 9.8E+0<br>5 | 6.7E+06 | 0.0E+0<br>0 | 96  | -       | -123.5 |
| 107 | Terpinenol                | 5.8E+05 | 1.6E+06 | 9.4E+04 | 100 | 6.9E+0<br>5 | 4.8E+06 | 7.5E+0<br>4 | 100 | 1.1E+05 | 16.4   |
| 118 | (-)-Neoisomenthol         | 3.7E+06 | 3.1E+07 | 0.0E+00 | 96  | 3.4E+0<br>6 | 4.4E+07 | 1.6E+0<br>4 | 100 | -       | -8.5   |
| 119 | <i>p</i> -Menth-1-en-4-ol | 4.2E+06 | 3.1E+07 | 0.0E+00 | 96  | 3.6E+0<br>6 | 4.8E+07 | 0.0E+0<br>0 | 89  | -       | -16.1  |
| 123 | Ylangene                  | 2.1E+06 | 1.6E+07 | 4.0E+05 | 100 | 1.0E+0<br>6 | 2.6E+06 | 2.4E+0<br>3 | 100 | -       | -106.1 |
| 124 | $\alpha$ -Caryophyllene   | 1.9E+06 | 4.2E+06 | 1.9E+05 | 100 | 1.4E+0<br>6 | 9.8E+06 | 7.3E+0<br>4 | 100 | -       | -37.2  |
| 126 | Myrtenal                  | 5.6E+05 | 3.6E+06 | 1.5E+04 | 100 | 4.0E+0<br>5 | 2.6E+06 | 0.0E+0<br>0 | 96  | -       | -42.4  |
| 129 | Isolatedene               | 4.0E+06 | 3.1E+07 | 1.6E+04 | 100 | 1.2E+0<br>6 | 6.8E+06 | 0.0E+0<br>0 | 89  | -       | -235.1 |
| 130 | Menthol                   | 2.1E+07 | 7.7E+07 | 0.0E+00 | 96  | 6.1E+0<br>6 | 4.8E+07 | 0.0E+0<br>0 | 96  | -       | -246.9 |
| 131 | $\beta$ -Chamigrene       | 4.9E+06 | 1.6E+07 | 8.6E+05 | 100 | 2.9E+0<br>6 | 1.1E+07 | 0.0E+0<br>0 | 96  | -       | -71.0  |
| 132 | Viridiflorene             | 2.3E+06 | 5.4E+06 | 4.2E+05 | 100 | 1.1E+0<br>6 | 5.6E+06 | 1.8E+0<br>5 | 100 | -       | -104.6 |
| 133 | $\beta$ -Guaiene          | 6.1E+06 | 1.5E+07 | 1.4E+06 | 100 | 3.2E+0<br>6 | 1.4E+07 | 2.1E+0<br>5 | 100 | -       | -90.1  |
| 135 | $\alpha$ -Amorphene       | 6.2E+06 | 5.1E+07 | 0.0E+00 | 93  | 1.9E+0<br>6 | 1.1E+07 | 0.0E+0<br>0 | 89  | -       | -231.6 |

|     |                                                                                                        |         |         |         |     |             |         |             |     |         |        |
|-----|--------------------------------------------------------------------------------------------------------|---------|---------|---------|-----|-------------|---------|-------------|-----|---------|--------|
| 140 | (S)-Carvone                                                                                            | 1.1E+07 | 3.1E+07 | 1.4E+06 | 100 | 6.1E+0<br>6 | 3.6E+07 | 1.4E+0<br>5 | 100 | -       | -85.3  |
| 142 | 4,4-Dimethyl-3-(3-methylbut-3-enylidene)-2-methylenebicyclo[4.1.0]heptane                              | 2.2E+06 | 1.6E+07 | 2.0E+05 | 100 | 9.9E+0<br>5 | 4.3E+06 | 8.5E+0<br>4 | 100 | -       | -124.2 |
| 144 | $\alpha$ -Terpineol                                                                                    | 9.2E+04 | 3.0E+05 | 0.0E+00 | 89  | 1.5E+0<br>5 | 6.9E+05 | 0.0E+0<br>0 | 61  | 5.7E+04 | 38.1   |
| 146 | $\alpha$ -Muurokene                                                                                    | 1.4E+06 | 9.3E+06 | 6.6E+04 | 100 | 1.0E+0<br>6 | 6.6E+06 | 2.2E+0<br>4 | 100 | -       | -43.5  |
| 147 | $\beta$ -Vatirene                                                                                      | 1.9E+06 | 8.1E+06 | 1.7E+05 | 100 | 1.1E+0<br>6 | 4.7E+06 | 1.9E+0<br>4 | 100 | -       | -77.3  |
| 148 | $\alpha$ -Chamigrene                                                                                   | 6.1E+06 | 4.9E+07 | 0.0E+00 | 96  | 2.2E+0<br>6 | 9.7E+06 | 0.0E+0<br>0 | 96  | -       | -183.2 |
| 150 | Spathulenol                                                                                            | 2.1E+07 | 1.0E+08 | 1.9E+06 | 100 | 1.5E+0<br>7 | 8.5E+07 | 1.3E+0<br>5 | 100 | -       | -34.6  |
| 151 | Phellandral                                                                                            | 2.1E+06 | 1.4E+07 | 1.9E+05 | 100 | 9.4E+0<br>5 | 3.3E+06 | 1.5E+0<br>4 | 100 | -       | -119.6 |
| 161 | $\alpha$ -Curcumene                                                                                    | 1.4E+07 | 7.3E+07 | 9.2E+05 | 100 | 5.7E+0<br>6 | 4.0E+07 | 1.8E+0<br>4 | 100 | -       | -140.1 |
| 167 | 9-Isopropyl-1-methyl-2-methylene-5-oxatricyclo[5.4.0.0(3,8)]undecane                                   | 3.8E+06 | 1.4E+07 | 1.7E+05 | 100 | 3.0E+0<br>6 | 3.4E+07 | 1.7E+0<br>4 | 100 | -       | -26.6  |
| 169 | Calamenene                                                                                             | 2.4E+07 | 1.3E+08 | 9.4E+05 | 100 | 1.4E+0<br>7 | 5.9E+07 | 3.5E+0<br>5 | 100 | -       | -73.7  |
| 179 | $\alpha$ -Calacorene                                                                                   | 1.3E+07 | 7.1E+07 | 4.8E+05 | 100 | 3.9E+0<br>6 | 2.2E+07 | 6.0E+0<br>4 | 100 | -       | -236.0 |
| 187 | Dehydro- $\beta$ -Ionone                                                                               | 6.9E+06 | 1.9E+07 | 4.4E+05 | 100 | 1.7E+0<br>6 | 5.9E+06 | 0.0E+0<br>0 | 89  | -       | -314.0 |
| 193 | $\gamma$ -Muurokene                                                                                    | 5.8E+06 | 1.6E+07 | 5.1E+05 | 100 | 9.2E+0<br>6 | 7.1E+07 | 1.8E+0<br>5 | 100 | 3.4E+06 | 37.1   |
| 199 | (8 <i>S</i> ,8 <i>aS</i> )-3,8-dimethyl-4-propan-2-ylidene-1,2,6,7,8,8 <i>a</i> -hexahydroazulen-5-one | 8.8E+05 | 4.7E+06 | 4.7E+04 | 100 | 3.6E+0<br>5 | 1.7E+06 | 2.9E+0<br>4 | 100 | -       | -146.1 |

|                        |                                                                                          |                |         |         |     |                |         |         |     |              |        |
|------------------------|------------------------------------------------------------------------------------------|----------------|---------|---------|-----|----------------|---------|---------|-----|--------------|--------|
| 209                    | 2,4a-Methanonaphthalen-7(4aH)-one, 1,2,3,4,5,6-hexahydro-1,1,5,5-tetramethyl-, (2s-cis)- | 8.2E+06        | 7.5E+07 | 3.4E+05 | 100 | 1.1E+07        | 6.6E+07 | 4.6E+04 | 100 | 2.6E+06      | 24.0   |
| 211                    | ar-Turmerone                                                                             | 4.2E+06        | 2.7E+07 | 4.8E+05 | 100 | 4.0E+06        | 2.2E+07 | 8.4E+04 | 100 | -<br>2.7E+05 | -6.8   |
|                        | <b>TOTAL</b>                                                                             | <b>1.9E+08</b> |         |         |     | <b>1.2E+08</b> |         |         |     |              |        |
| <b>Other Compounds</b> |                                                                                          |                |         |         |     |                |         |         |     |              |        |
| 1                      | 1,2-Diaminopropane                                                                       | 8.5E+07        | 2.6E+08 | 5.7E+07 | 100 | 8.6E+07        | 2.4E+08 | 2.2E+07 | 100 | 8.6E+05      | 1.0    |
| 23                     | 3,4,5-Trimethylpyrazole                                                                  | 4.5E+05        | 1.7E+06 | 2.6E+04 | 100 | 4.5E+05        | 1.7E+06 | 0.0E+00 | 93  | -<br>2,1E+03 | -0.5   |
| 26                     | Linaloyl oxide                                                                           | 1.6E+05        | 5.4E+05 | 0.0E+00 | 93  | 5.2E+05        | 4.0E+06 | 0.0E+00 | 86  | 3,6E+05      | 69.3   |
| 149                    | 3,6-dimethyl-2H-indazole                                                                 | 1.6E+06        | 6.3E+06 | 3.3E+05 | 100 | 7.2E+05        | 2.7E+06 | 0.0E+00 | 96  | -<br>9.3E+05 | -129.3 |
| 217                    | Benzoic acid                                                                             | 4.8E+06        | 2.5E+07 | 8.7E+03 | 100 | 9.0E+06        | 9.8E+07 | 2.1E+05 | 100 | 8.6E+05      | 1.0    |
|                        | <b>TOTAL</b>                                                                             | <b>8.7E+07</b> |         |         |     | <b>8.7E+07</b> |         |         |     |              |        |

**Table S2.** Results of the target groups discrimination following the use of different classification algorithms. The variables (uVOMs) used in each assay are described in Table 4.

| All data processing                   |                 |                          |                         |              |
|---------------------------------------|-----------------|--------------------------|-------------------------|--------------|
| <i>Algorithm</i>                      | <i>Accuracy</i> | <i>Sensitivity (CTL)</i> | <i>Specificity (LC)</i> | <i>AUC</i>   |
| <i>SVM</i>                            | 96.33           | 92.59                    | 100                     | 0.975        |
| <i>RF</i>                             | 94.66           | 88.88                    | 100                     | 0.984        |
| <i>PLS-DA</i>                         | 96.33           | 96.29                    | 96.42                   | 0.989        |
| <i>MLP</i>                            | <b>98</b>       | 96.29                    | 100                     | <b>0.999</b> |
| Upon CFS variable selection           |                 |                          |                         |              |
| <i>Algorithm</i>                      | <i>Accuracy</i> | <i>Sensitivity (CTL)</i> | <i>Specificity (LC)</i> | <i>AUC</i>   |
| <i>SVM</i>                            | 96.31           | 92.59                    | 100                     | 0.996        |
| <i>RF</i>                             | 96.46           | 96.29                    | 96.42                   | 0.997        |
| <i>PLS-DA</i>                         | 96.31           | 92.59                    | 100                     | 0.998        |
| <i>MLP</i>                            | <b>97.83</b>    | 97.40                    | 98.21                   | <b>0.999</b> |
| Upon CFS + F-score variable selection |                 |                          |                         |              |
| <i>Algorithm</i>                      | <i>Accuracy</i> | <i>Sensitivity (CTL)</i> | <i>Specificity (LC)</i> | <i>AUC</i>   |
| <i>SVM</i>                            | 100             | 100                      | 100                     | 1            |
| <i>RF</i>                             | 98.33           | 96.29                    | 100                     | 0.999        |
| <i>PLS-DA</i>                         | 96              | 92.59                    | 100                     | 0.997        |
| <i>MLP</i>                            | <b>100</b>      | 97.40                    | 98.21                   | <b>0.999</b> |

**Table S3.** Pathway analysis results

| <i>Pathway name</i>                     | <i>Total com-pounds</i> | <i>Match status</i> | <i>p</i> | <i>-log(p)</i> | <i>Holm p</i> | <i>FDR</i> | <i>Impact</i> |
|-----------------------------------------|-------------------------|---------------------|----------|----------------|---------------|------------|---------------|
| Pyruvate metabolism                     | 22                      | 1                   | 0.057608 | 1.2395         | 0.28804       | 0.096014   | 0.06065       |
| Glycolysis / Gluconeogenesis            | 26                      | 1                   | 0.057608 | 1.2395         | 0.28804       | 0.096014   | 0.02906       |
| Glyoxylate and dicarboxylate metabolism | 32                      | 1                   | 0.057608 | 1.2395         | 0.28804       | 0.096014   | 0             |
| Fatty acid biosynthesis                 | 47                      | 3                   | 0.23999  | 0.6198         | 0.47998       | 0.29999    | 0             |
| Sulfur metabolism                       | 8                       | 1                   | 0.95175  | 0.021475       | 0.95175       | 0.95175    | 0             |

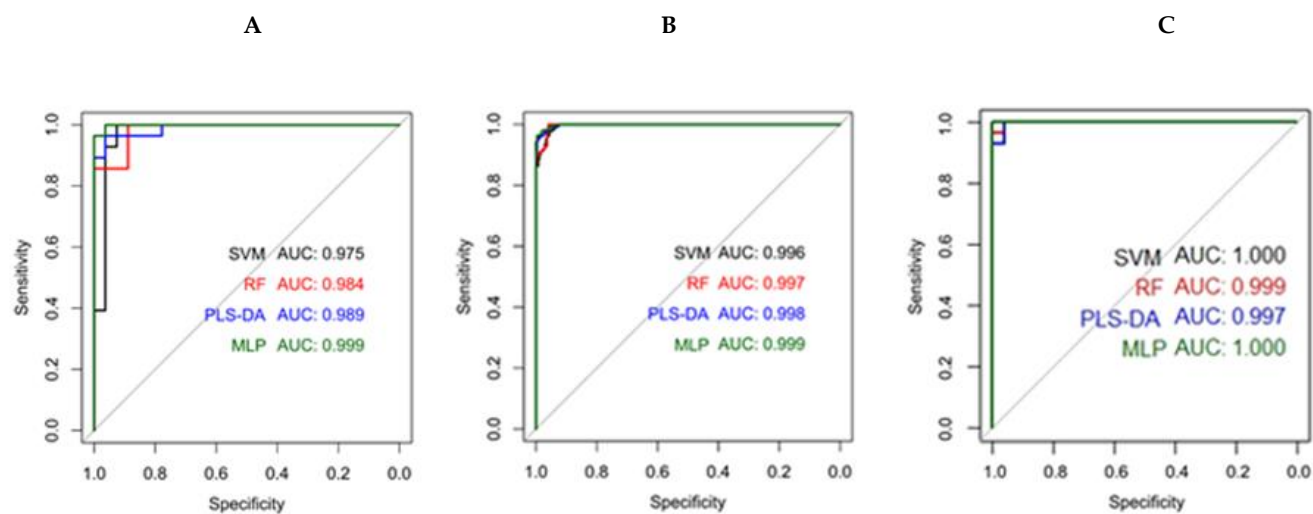

**Figure S1.** Performance of the variables identified with the different algorithms described in Table 2 and Table S3.

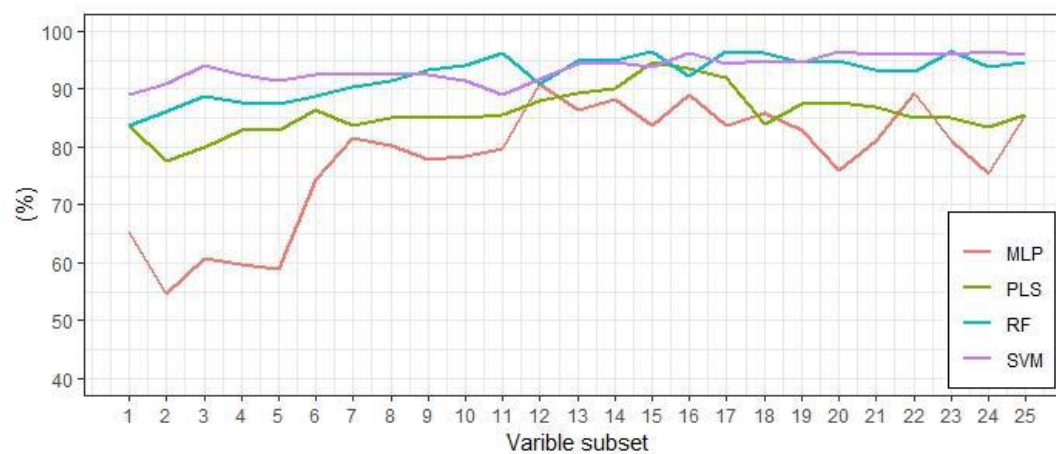

**Figure S2.** Results of the classification of the 25 groups generated from the F-score classification of the uVOMs identified in this work.
